# Supplementary material for: Minimal gene set discovery in single-cell mRNA-seq datasets with ActiveSVM
Source: PubMed Central journal article supplement (PMC10766518; doi:10.1038/s43588-022-00263-8), 2022-06-27
Supplement: 43588_2022_263_MOESM1_ESM.pdf [file 43588_2022_263_MOESM1_ESM.pdf]

---

**Supplementary information**

---

**Minimal gene set discovery in single-cell mRNA-seq datasets with ActiveSVM**

---

In the format provided by the authors and unedited

# Supplementary Information

## Algorithm

For notation, in single-cell gene expression data, we use  $x_i^{(j)} \in \mathbb{R}$  to denote the measurement of the  $j$ -th gene of the  $i$ -th cell. We assume the classification labels are given and consider a data-set  $\{x_i, y_i\}_{i \in \{1, \dots, N\}}$  contains  $N$  cells with total  $M$  genes, where  $x_i = [x_i^{(j)}]_{j \in \{1, \dots, M\}}$  and  $y_i \in \mathbb{Z}$  are labels. The labels could be binary or multi-class and can be derived from clustering. We also denote the gene expression vector of  $i$ -th cell with part of genes as  $x_i^{(D)} = [x_i^{(j)}]_{j \in D}$ , where  $D \subset \{1, \dots, M\}$ . And we use  $J$  and  $I$  to refer to the set of selected genes and cell set.

We adopt the SVM classifier notation of one observation is  $h_{w,b}(x_i^{(D)}) = g(w^T x_i^{(D)} + b)$  for any  $i \in \{1, 2, \dots, N\}$  and  $D \subset \{1, 2, \dots, M\}$  with respect to observation  $x \in \mathbb{R}^{|D|}$ , where  $w \in \mathbb{R}^{|D|}$  and  $b \in \mathbb{R}$  are parameters (the margin and bias respectively). Here,  $g(z) = 1$  if  $z \geq 0$ , and  $g(z) = -1$  otherwise. And the loss function is Hinge Loss[1]  $\text{loss}_i = \max\{0, 1 - y_i(w^T x_i^{(D)} + b)\}$ , where  $y_i \in \mathbb{R}$  is the ground truth label of observation  $x_i$ .

---

### Algorithm 1: Active Linear SVM Gene Selection

---

**Input:**  $c, k \in \mathbb{N}, J = \emptyset$

**Output:**  $J$

Randomly or ‘balanced’ select  $c$  cells  $I \subset \{1, \dots, N\}, |I| = c$

Train 1-D SVM models on training set  $I$  for each candidate gene:  $\{h_{w,b}^{(j)}\}_{j \in \{1, \dots, M\}}$

$\text{loss}_j = \sum_{i \in I} \max\{0, 1 - y_i(w^T x_i^{(j)} + b)\}$

Select one gene  $j_0 \in \{1, \dots, M\}$  with lowest  $\text{loss}_j$

$J = J \cup \{j_0\}$

**repeat**

    Optimize (1) and get optimal solution  $\{\alpha_i^*\}_{i=1}^N$

    Get the the set of misclassified cells  $S \subset \{1, \dots, N\}$  with  $\alpha_i^* = C$

**if min-complexity then**

        Randomly or ‘balanced’ select  $c$  cells  $I \subset S$ , where  $|I| = c$ ;

**else**

**if min-cell then**

$c' = \min\{c, |I \cap S|\}$ ;

            Randomly or ‘balanced’ select  $c - c'$  cells  $I' \subset S \setminus I$ , where  $|I'| = c - c'$ ;

$I = I \cup I'$

**end**

**end**

$w = \sum_{i \in I} \alpha_i^* y_i x_i^{(J)}$

$w_{padded} = [w, 0]$

    For each  $j \in \{1, \dots, M\} \setminus J$ , optimize (4) and get optimal solution  $\{\alpha_i^{*(j)}\}_{i \in I}$

$w_j = \sum_{i \in I} \alpha_i^{*(j)} y_i x_i^{(J \cup \{j\})}$

$\vartheta_j = \arccos \cos \vartheta_j = \arccos \frac{\langle w_j, w_{padded} \rangle}{\|w_j\| \|w_{padded}\|}$

    Select one gene  $j^* \in \{1, \dots, M\} \setminus J$  with largest  $\vartheta_j$

$J = J \cup \{j^*\}$

**until**  $|J| \geq k$

---

# Supplementary Figures

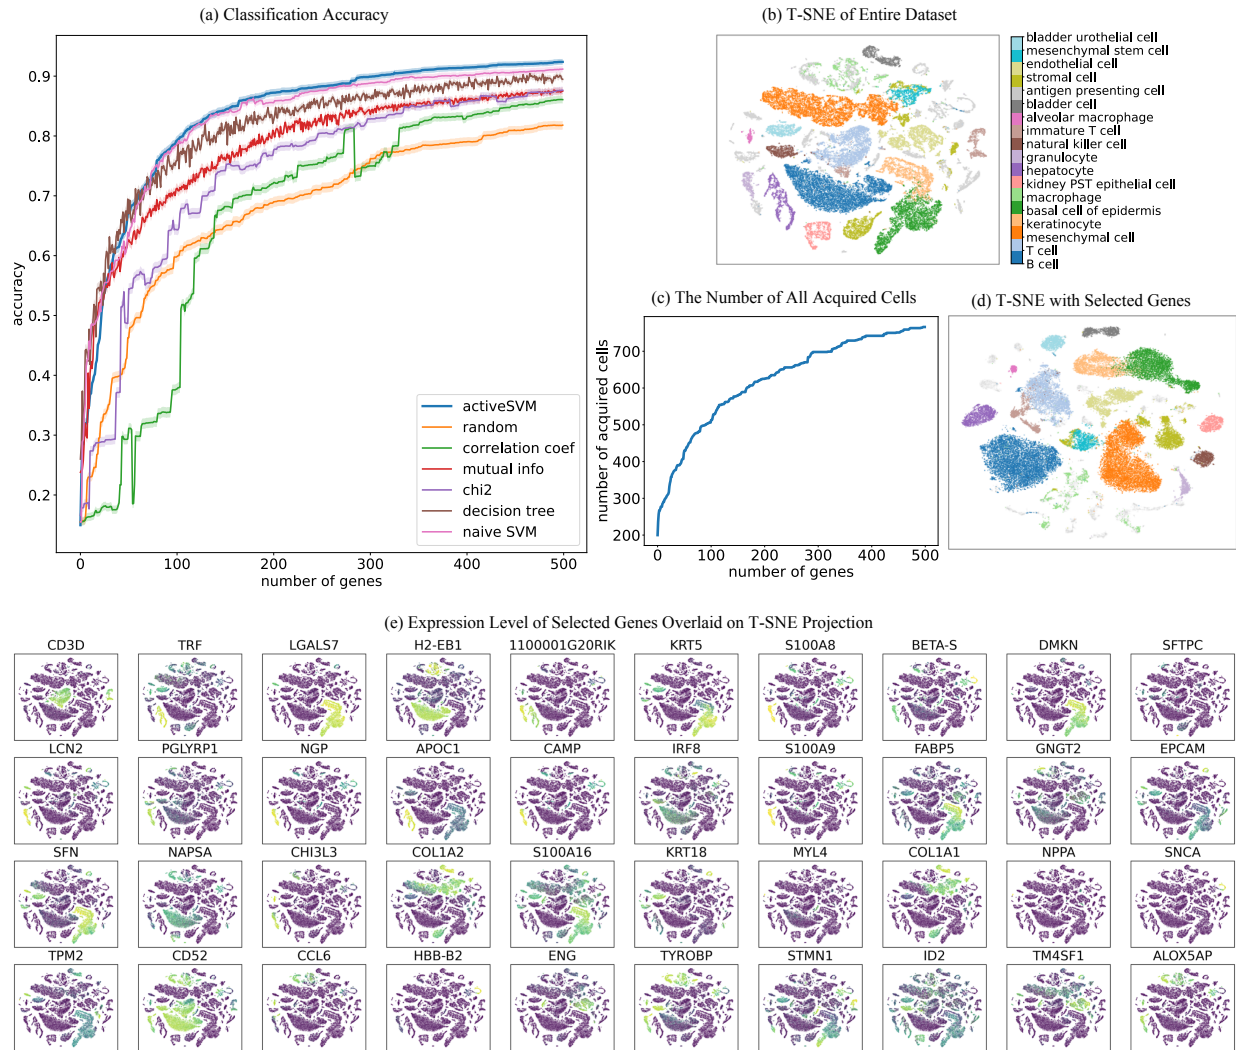

**Supplementary Figure 1: Minimal gene sets for cell-type classification in the Tabula Muris mouse tissue survey.** Classification results of 500 genes selected using the min-cell strategy with 200 cells per iteration. The subplots contain: (a) classification accuracy vs gene set size; (b) the t-SNE plots of the entire filtered dataset; (c) the total number of unique cells used vs gene set size; (d) the t-SNE plots of the gene set selected with 'balanced' sampling; (e) the expression level overlaid on t-SNE projection for genes selected.

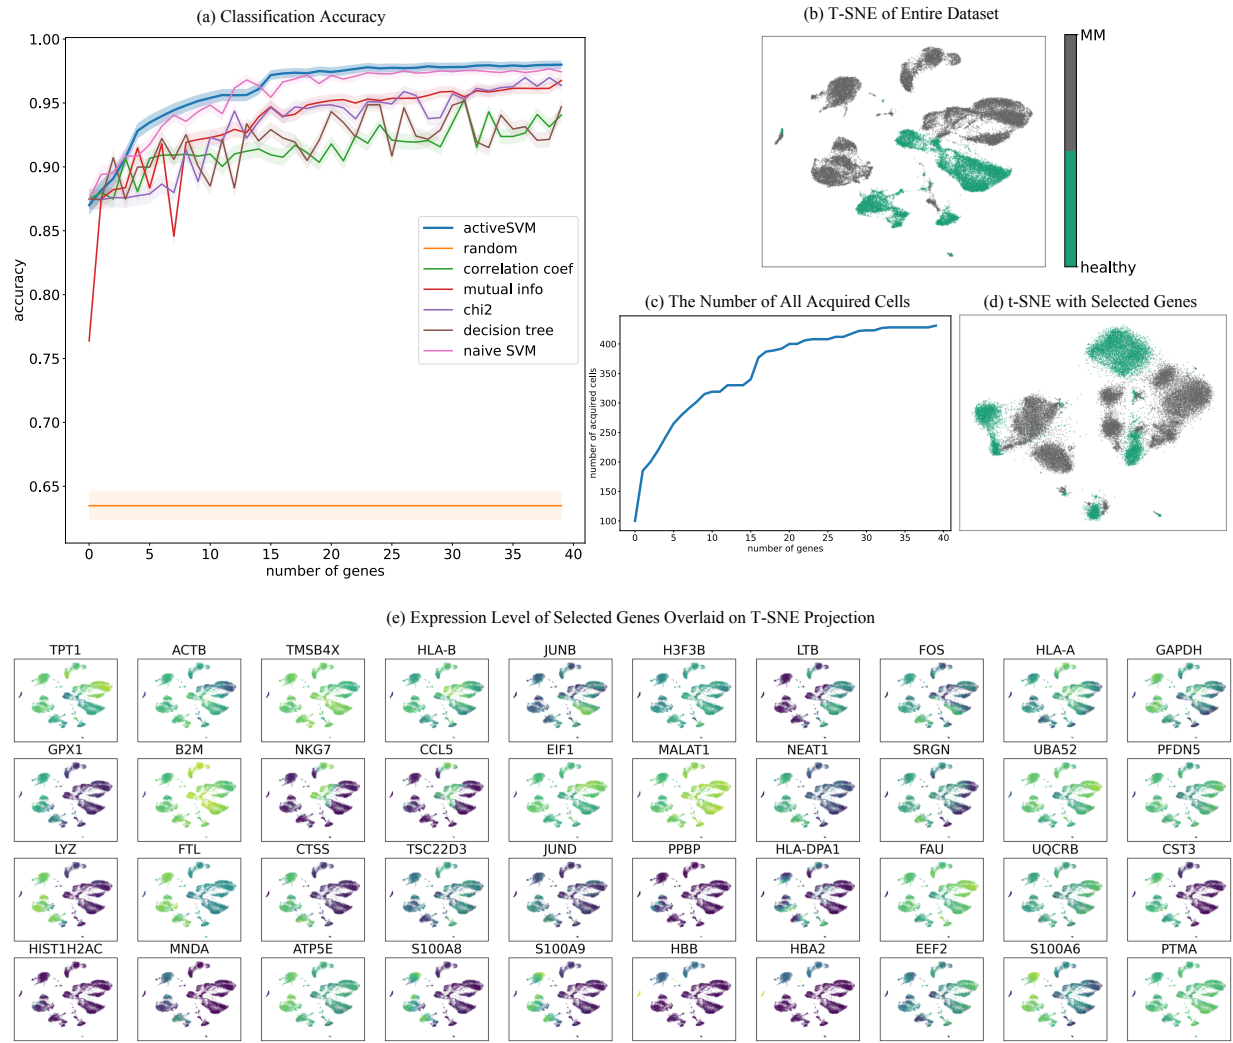

**Supplementary Figure 2: Gene set selection for healthy vs disease classification in multiple myeloma dataset.** Classification results of 40 genes selected using min-cell strategy with 100 cells per iteration. (a) classification accuracy vs gene set size; (b) the t-SNE plots of the entire filtered dataset; (c) the total number of unique cells used vs gene set size; (d) the t-SNE plots of the gene set selected with 'balanced' sampling; (e) the expression level overlaid on t-SNE projection for genes selected.

## Computational Time Consumption

To analyze computational requirements of ActiveSVM, we performed analysis using an r5n.24xlarge, a type of EC2 virtual server instance on AWS, with 96 virtual central processing units (vCPU) and 768 GiB memory on Linux system. The run time and peak memory usage of ActiveSVM on all six datasets are shown in Supplementary Table 1.

**Supplementary Table 1: Run Time and Peak Memory Usage of ActiveSVM.**

|                | matrix size<br>(cells, genes) | min-complexity<br>run time (s/gene) | min-cell run<br>time (s/gene) | memory<br>(MB) | unique cells<br>(min-cell) |
|----------------|-------------------------------|-------------------------------------|-------------------------------|----------------|----------------------------|
| mouse megacell | (1306127, 27998)              | 4142/50                             | 14580/50                      | 2111           | 712                        |
| PBMC           | (10194, 6915)                 | 121/50                              | 176/20                        | 1325           | 298                        |
| Tabula Muris   | (55656, 8661)                 | 737/150                             | 7701/100                      | 1093           | 779                        |
| MM             | (35159, 32527)                | 127/40                              | 449/40                        | 1616           | 445                        |
| seqFish        | (913, 10000)                  | 33/30                               | 728/30                        | 887            | 428                        |
| perturb-seq    | (10895, 15976)                | 3424/50                             |                               | 9493           | 3827                       |

## Parameter Optimization

For conventional and ActiveSVM, we found the approximately optimal parameter by grid-search [2] across lists of candidate values for some key parameters in the framework of 3-fold cross validation [3]. The optimal parameters were fixed during all iterations. For the comparison methods, we use 3-fold cross validation grid-search to obtain the optimal parameters at each single iteration. We also implemented the algorithms called `min_complexity_cv` and `min_acquisition_cv` that apply grid-search and cross validation for each single SVM trained in each iteration (see Code Availability).

Here we provide the algorithm parameters we used for ActiveSVM in Supplementary Table 2-4. Besides the training set and test set, there are 15 user-defined hyper-parameters in ActiveSVM, five of which are about the feature selection procedure and the other ten are commonly-used parameters for linear SVM classifier. The detailed description about all parameters of ActiveSVM are detailed described in the integrated package page <https://pypi.org/project/activeSVC/>.

As for comparison methods, correlation coefficient, mutual information, and chi-squared methods don't have specific parameters to set. We implemented them with scikit-learn[4] package 'SelectKBest'. For feature importance scores from decision tree and naive SVM, we did grid-search on key parameters based on 3-fold cross validation at each step. The parameters of decision tree are *criterion* and *min\_samples\_leaf* and of naive SVM are *tol* and *C*.

**Supplementary Table 2:** Parameters of ActiveSVM (PBMC and mouse megacell datasets).

|                          | PBMC<br>(min-complexity) | PBMC<br>(min-cell) | mouse megacell<br>(min-complexity) | mouse megacell<br>(min-cell) |
|--------------------------|--------------------------|--------------------|------------------------------------|------------------------------|
| <i>num_features</i>      | 50                       | 20                 | 50                                 | 50                           |
| <i>num_samples</i>       | 20                       | 100                | 20                                 | 100                          |
| <i>init_features</i>     | 1                        | 1                  | 1                                  | 1                            |
| <i>init_samples</i>      | 20                       | 200                | 20                                 | 100                          |
| <i>balance</i>           | True/False               | True               | True                               | True                         |
| <i>penalty</i>           | 'l2'                     | 'l2'               | 'l2'                               | 'l2'                         |
| <i>loss</i>              | squared_hinge            | squared_hinge      | squared_hinge                      | squared_hinge                |
| <i>dual</i>              | True                     | True               | True                               | True                         |
| <i>tol</i>               | 1e-4                     | 1e-4               | 1e-4                               | 1e-4                         |
| <i>C</i>                 | 1.0                      | 1.0                | 1.0                                | 1.0                          |
| <i>fit_intercept</i>     | True                     | True               | True                               | True                         |
| <i>intercept_scaling</i> | 1                        | 1                  | 1                                  | 1                            |
| <i>class_weight</i>      | None                     | None               | 'balanced'                         | 'balanced'                   |
| <i>random_state</i>      | None                     | None               | None                               | None                         |
| <i>max_iter</i>          | 1000                     | 1000               | 1000                               | 1000                         |

**Supplementary Table 3:** Parameters of ActiveSVM (Tabula Muris and MM datasets).

|                          | Tabula Muris<br>(min-complexity) | Tabula Muris<br>(min-cell) | MM<br>(min-complexity) | MM<br>(min-cell) |
|--------------------------|----------------------------------|----------------------------|------------------------|------------------|
| <i>num_features</i>      | 150                              | 500                        | 40                     | 40               |
| <i>num_samples</i>       | 20                               | 200                        | 20                     | 100              |
| <i>init_features</i>     | 1                                | 1                          | 1                      | 1                |
| <i>init_samples</i>      | 20                               | 200                        | 20                     | 100              |
| <i>balance</i>           | True/False                       | False                      | True/False             | False            |
| <i>penalty</i>           | 'l2'                             | 'l2'                       | 'l2'                   | 'l2'             |
| <i>loss</i>              | squared_hinge                    | squared_hinge              | squared_hinge          | squared_hinge    |
| <i>dual</i>              | True                             | True                       | True                   | True             |
| <i>tol</i>               | 1e-4                             | 1e-4                       | 1e-4                   | 1e-4             |
| <i>C</i>                 | 1.0                              | 1.0                        | 1.0                    | 1.0              |
| <i>fit_intercept</i>     | True                             | True                       | True                   | True             |
| <i>intercept_scaling</i> | 1                                | 1                          | 1                      | 1                |
| <i>class_weight</i>      | None                             | None                       | None                   | None             |
| <i>random_state</i>      | None                             | None                       | None                   | None             |
| <i>max_iter</i>          | 1000                             | 1000                       | 1000                   | 1000             |

**Supplementary Table 4:** Parameters of ActiveSVM (perturb-seq and seqFish datasets).

|                          | perturb-seq<br>(min-complexity) | seqFish<br>(min-complexity) |
|--------------------------|---------------------------------|-----------------------------|
| <i>num_features</i>      | 50                              | 30                          |
| <i>num_samples</i>       | 500                             | 10                          |
| <i>init_features</i>     | 1                               | 1                           |
| <i>init_samples</i>      | 1000                            | 10                          |
| <i>balance</i>           | True                            | False                       |
| <i>penalty</i>           | 'l2'                            | 'l2'                        |
| <i>loss</i>              | squared_hinge                   | squared_hinge               |
| <i>dual</i>              | True                            | True                        |
| <i>tol</i>               | 1e-6                            | 1                           |
| <i>C</i>                 | 1.0                             | 10                          |
| <i>fit_intercept</i>     | True                            | True                        |
| <i>intercept_scaling</i> | 1                               | 1                           |
| <i>class_weight</i>      | 'balanced'                      | None                        |
| <i>random_state</i>      | None                            | None                        |
| <i>max_iter</i>          | 1,000,000                       | 100,000                     |

## References

- [1] L. Rosasco, E. De Vito, A. Caponnetto, M. Piana, and A. Verri, "Are loss functions all the same?," *Neural computation*, vol. 16, no. 5, pp. 1063–1076, 2004.
- [2] I. Syarif, A. Prugel-Bennett, and G. Wills, "Svm parameter optimization using grid search and genetic algorithm to improve classification performance," *Telkomnika*, vol. 14, no. 4, p. 1502, 2016.
- [3] S. Arlot and A. Celisse, "A survey of cross-validation procedures for model selection," *Statistics surveys*, vol. 4, pp. 40–79, 2010.
- [4] F. Pedregosa, G. Varoquaux, A. Gramfort, V. Michel, B. Thirion, O. Grisel, M. Blondel, P. Prettenhofer, R. Weiss, V. Dubourg, J. Vanderplas, A. Passos, D. Cournapeau, M. Brucher, M. Perrot, and E. Duchesnay, "Scikit-learn: Machine learning in Python," *Journal of Machine Learning Research*, vol. 12, pp. 2825–2830, 2011.
